# Supplementary material for: Krisenreaktion zu Beginn der COVID-19-Pandemie in Sammelunterkünften für Geflüchtete
Source: Springer Nature journal article supplement (doi:10.1007/s00103-023-03745-w), 2023-07-07
Supplement: MOESM1 [file 25585744]

## Onlinematerial 1

### Semistrukturierter Leitfaden

1. Können Sie uns bitte kurz erläutern, wie Sie mit dem neuartigen Coronavirus in Ihren Aufnahmeeinrichtungen/ Gemeinschaftunterkünften umgehen?
2. Gibt es Landesspezifische / Landkreisspezifische Vorgaben zum Umgang und wenn ja welche?
3. Über welche Quellen beziehen Sie Ihre Informationen zum Umgang mit der Situation?
4. Wie erfahren Sie, dass es in Ihrer Unterkunft einen (potenziellen) COVID-19-Fall gibt? Was passiert dann?
5. Wie werden die Maßnahmen sozialer Distanzierung in den Unterkünften umgesetzt?
6. Wie erfolgen denn derzeit Angebote, die normalerweise in den Unterkünften gewährleistet werden, wie zum Beispiel die der Verfahrens- und Sozialberatung?
7. Wie informieren Sie die Bewohner über die Maßnahmen?
8. Mit welchen Akteuren auf Landes-/Landkreisebene arbeiten Sie im Zusammenhang mit der Versorgung Geflüchteter eng zusammen? Wie ist die Zusammenarbeit organisiert?
9. Wir haben jetzt verschiedene Punkte rund um den Umgang mit Covid-19 angesprochen. Gibt es aus Ihrer Sicht noch wichtige Punkte, die wir bisher noch nicht besprochen haben?

### Codesystem zur Auswertung der Interviews (Oberkategorien)

1. Informieren von Bewohner\*innen
2. Physische Distanzierung Bewohner\*innen
3. Schutz- & Hygienemaßnahmen
4. Physische Distanzierung Mitarbeitende
5. Angebote
6. Intersektorale Zusammenarbeit
7. Gesundheitsversorgung
8. Testung
9. Eindämmungsmaßnahmen
10. Politischer Handlungsspielraum
11. Setting
12. Sonstiges allgemein

## Onlinematerial 2

Anzahl der Interviews in denen eine Zusammenarbeit mit dem jeweiligen Akteur beschrieben wird, insgesamt und nach Bereichen der Zusammenarbeit (N=46 Interviews)

| Akteur                         | Gesamt | Zusammenarbeit mit Akteur nach Bereichen |                              |         |            |           |
|--------------------------------|--------|------------------------------------------|------------------------------|---------|------------|-----------|
|                                |        | Konzepterstellung                        | Aufklärung<br>Bewohner*innen | Testung | Quarantäne | Verlegung |
| Gesundheitsamt                 | 40     | 15                                       | 2                            | 38      | 12         | 0         |
| Sozialarbeit/-betreuung        | 28     | 1                                        | 24                           | 7       | 2          | 3         |
| Sicherheitsdienst              | 14     | 1                                        | 3                            | 4       | 10         | 0         |
| med. Ambulanz                  | 13     | 1                                        | 0                            | 12      | 3          | 0         |
| Ärzt*innen (ambulant)          | 11     | 0                                        | 2                            | 6       | 3          | 0         |
| Alltagsbetreuung               | 8      | 0                                        | 5                            | 1       | 2          | 0         |
| Kommunen                       | 8      | 0                                        | 0                            | 1       | 4          | 4         |
| Klinikum                       | 7      | 1                                        | 0                            | 6       | 2          | 0         |
| Sprachmittler*innen            | 7      | 0                                        | 4                            | 3       | 2          | 0         |
| Hausmeister*innen              | 6      | 0                                        | 6                            | 0       | 0          | 0         |
| Ordnungsamt                    | 6      | 0                                        | 0                            | 2       | 5          | 0         |
| Unterkunftsleitung             | 6      | 0                                        | 5                            | 3       | 0          | 0         |
| Bundeswehr                     | 5      | 0                                        | 0                            | 5       | 4          | 0         |
| DRK                            | 5      | 1                                        | 0                            | 1       | 4          | 0         |
| Ehrenamt                       | 5      | 0                                        | 2                            | 0       | 3          | 0         |
| Ärztlicher Bereitschaftsdienst | 4      | 0                                        | 0                            | 4       | 0          | 0         |
| div. Dienstleister             | 4      | 0                                        | 0                            | 2       | 2          | 0         |
| Katastrophenschutz             | 4      | 2                                        | 0                            | 0       | 2          | 1         |
| Labor                          | 4      | 0                                        | 0                            | 4       | 0          | 0         |
| Polizei                        | 4      | 1                                        | 0                            | 0       | 3          | 0         |
| Catering-Dienstleister         | 3      | 0                                        | 0                            | 0       | 1          | 0         |
| Fieberambulanz                 | 3      | 0                                        | 0                            | 3       | 0          | 0         |

|                                                       |   |   |   |   |   |   |
|-------------------------------------------------------|---|---|---|---|---|---|
| Handwerker*innen                                      | 3 | 0 | 0 | 0 | 3 | 0 |
| Landkreis                                             | 3 | 1 | 0 | 0 | 1 | 1 |
| Malteser                                              | 3 | 0 | 1 | 2 | 2 | 0 |
| Peer-Multiplikator*innen /<br>Bewohnervertreter*innen | 3 | 0 | 3 | 0 | 0 | 0 |
| Rettungsdienst & Krankentransport                     | 3 | 1 | 0 | 1 | 1 | 0 |
| Johanniter                                            | 2 | 0 | 0 | 1 | 2 | 0 |
| Landesgesundheitsamt                                  | 2 | 1 | 0 | 1 | 0 | 0 |
| Mobile Testteams                                      | 2 | 0 | 0 | 2 | 0 | 0 |
| Sozialministerium                                     | 2 | 0 | 0 | 0 | 1 | 1 |
| Supermarkt                                            | 2 | 1 | 0 | 0 | 1 | 0 |
| Amt für ÖPNV                                          | 1 | 0 | 0 | 1 | 0 | 0 |
| Ärzte ohne Grenzen                                    | 1 | 0 | 1 | 0 | 1 | 0 |
| Betreiber                                             | 1 | 1 | 0 | 0 | 0 | 0 |
| caritative Einrichtung                                | 1 | 0 | 0 | 0 | 1 | 0 |
| ext. med. Unternehmen                                 | 1 | 1 | 0 | 0 | 0 | 0 |
| Feuerwehr                                             | 1 | 1 | 0 | 0 | 0 | 0 |
| Gesundheitsbeauftragte                                | 1 | 0 | 0 | 1 | 0 | 0 |
| Innenbehörde                                          | 1 | 1 | 0 | 0 | 0 | 0 |
| Innenministerium                                      | 1 | 0 | 0 | 0 | 0 | 1 |
| Jugendherberge                                        | 1 | 0 | 0 | 0 | 0 | 1 |
| Kassenärztliche Vereinigung                           | 1 | 0 | 0 | 0 | 1 | 0 |
| Landesmigrationsverband                               | 1 | 0 | 1 | 1 | 0 | 0 |
| Regierungspräsidium                                   | 1 | 0 | 0 | 0 | 0 | 1 |
| Stadtkreis                                            | 1 | 1 | 0 | 0 | 0 | 0 |
| Taxi                                                  | 1 | 0 | 0 | 1 | 0 | 0 |
| Wohnungslosenhilfe                                    | 1 | 1 | 0 | 0 | 0 | 0 |

### Onlinematerial 3

**Anzahl der genannten Akteure mit denen eine Zusammenarbeit beschrieben wird pro Interview, gesamt und nach Unterkunftsart (N=46 Interviews)**

|                                            | <b>Median</b> | <b>Mittelwert</b> | <b>min</b> | <b>max</b> |
|--------------------------------------------|---------------|-------------------|------------|------------|
| Gesamt                                     | 5             | 5,2               | 0          | 11         |
| Erstaufnahmeeinrichtungen (EA):            | 6             | 6,4               | 3          | 11         |
| Gemeinschaftsunterkünfte Landkreis (LK):   | 4             | 4,2               | 0          | 10         |
| Gemeinschaftsunterkünfte Stadtkreis (SK):  | 4,5           | 5,1               | 0          | 10         |
| Gemeinschaftsunterkünfte gesamt (LK + SK): | 4             | 4,4               | 0          | 10         |
